# Supplementary material for: Archaeal Sources of Intact Membrane Lipid Biomarkers in the Oxygen Deficient Zone of the Eastern Tropical South Pacific
Source: PubMed Central journal article supplement (PMC6470261; doi:10.3389/fmicb.2019.00765), 2019-04-11
Supplement: Data_Sheet_1.pdf [file Data_Sheet_1.pdf]

## **Supplementary Material**

### **Archaeal sources of intact membrane lipid biomarkers in the oxygen deficient zone of the eastern tropical South Pacific**

Martina Sollai, Laura Villanueva, Ellen C. Hopmans, Richard G. Keil and Jaap S. Sinninghe Damsté\*

Correspondence: Corresponding Authors: [jaap.damste@nioz.nl](mailto:jaap.damste@nioz.nl); [laura.villanueva@nioz.nl](mailto:laura.villanueva@nioz.nl)

**Table S1.** The table lists the coastal (48, 51, 54, 58a, 58b, 61, 64a, 64b) and open ocean (11, 14, 15, 24) stations sampled for SPM using multiple *in situ* pump devices, during the NBP13-0 cruise (June–July 2013) aboard of the *R/V Nathaniel B. Palmer*. For each cast the depth (meters) of the sampling and the corresponding potential density ( $\sigma_\theta$ ,  $\text{kg m}^{-3}$ ), the oxygen concentration measured ( $\mu\text{mol kg}^{-1}$ ), the location (DMS, longitude and latitude), the date (dd/mm/yyyy) and the volume of water filtered by the pump deployed (Liters) are reported.

| Station* | Depth of SPM sampling | Potential density      | O <sub>2</sub>              | Location DMS (lon/lat) |             | Date       | Amount of water filtered** |
|----------|-----------------------|------------------------|-----------------------------|------------------------|-------------|------------|----------------------------|
| nr       | (m)                   | ( $\text{kg m}^{-3}$ ) | ( $\mu\text{mol kg}^{-1}$ ) | S                      | W           | dd/mm/yyyy | (L)                        |
| 58b      | 22                    | 25.63                  | 211.8                       | 20°44'59.7"            | 70°39'30.6" | 19/07/2013 | 264                        |
| 64a      | 60                    | 26.05                  | 21.5                        | 20°42'23.2"            | 70°42'31.1" | 21/07/2013 | 382                        |
| 54       | 75                    | 26.19                  | 2.1                         | 20°46'22.6"            | 70°48'51.6" | 18/07/2013 | 452                        |
| 64b      | 83                    | 26.18                  | 2.2                         | 20°42'23.5"            | 70°42'29.0" | 21/07/2013 | 1567                       |
| 58a      | 100                   | 26.30                  | 2.2                         | 20°45'23.3"            | 70°39'06.4" | 19/07/2013 | 1834                       |
| 51       | 135                   | 26.30                  | 2.2                         | 20°28'27.6"            | 70°41'32.4" | 17/07/2013 | 977                        |
| 58a      | 150                   | 26.40                  | 2.2                         | 20°45'23.3"            | 70°39'06.4" | 19/07/2013 | 740                        |
| 58b      | 175                   | 26.45                  | 2.2                         | 20°44'59.7"            | 70°39'30.6" | 19/07/2013 | 2286                       |
| 64a      | 200                   | 26.42                  | 2.2                         | 20°42'23.2"            | 70°42'31.1" | 21/07/2013 | 1477                       |
| 51       | 235                   | 26.50                  | 2.2                         | 20°28'27.6"            | 70°41'32.4" | 17/07/2013 | 3014                       |
| 61       | 250                   | 26.48                  | 2.3                         | 20°43'46.5"            | 70°40'15.0" | 20/07/2013 | 2668                       |
| 61       | 300                   | 26.61                  | 2.4                         | 20°43'46.5"            | 70°40'15.0" | 20/07/2013 | 745                        |
| 64b      | 350                   | 26.71                  | 2.5                         | 20°42'23.5"            | 70°42'29.0" | 21/07/2013 | 549                        |
| 48       | 500                   | 26.95                  | 14.6                        | 20°33'07.1"            | 70°44'00.0" | 16/07/2013 | 1031                       |
| 48       | 1000                  | 27.39                  | 65.0                        | 20°33'07.1"            | 70°44'00.0" | 16/07/2013 | 4028                       |
| 15       | 100                   | 26.00                  | 54.4                        | 13°55'19.7"            | 81°16'38.8" | 03/07/2013 | 2306                       |
| 14       | 125                   | 26.18                  | 2.1                         | 13°29'36.0"            | 81°12'06.2" | 04/07/2013 | 3400                       |
| 11       | 155                   | 26.35                  | 2.1                         | 14°00'44.8"            | 81°07'10.1" | 05/07/2013 | 851                        |
| 14       | 175                   | 26.35                  | 2.1                         | 13°29'36.0"            | 81°12'06.2" | 06/07/2013 | 783                        |
| 24       | 200                   | 26.45                  | 2.2                         | 13°25'30.6"            | 81°13'50.5" | 07/07/2013 | 3391                       |
| 11       | 235                   | 26.50                  | 2.2                         | 14°00'44.8"            | 81°07'10.1" | 08/07/2013 | 3209                       |
| 24       | 300                   | 26.69                  | 2.4                         | 13°25'30.6"            | 81°13'50.5" | 09/07/2013 | 875                        |
| 24       | 500                   | 26.99                  | 15.9                        | 13°25'30.6"            | 81°13'50.5" | 10/07/2013 | 1036                       |
| 24       | 1000                  | 27.37                  | 55.8                        | 13°25'30.6"            | 81°13'50.5" | 11/07/2013 | 4051                       |

\*Stations 58 and 64 were sampled twice

\*\*Reading of the flow meter

**Table S2.** Physicochemical conditions in the ETSP water column at the coastal (st. 48, 54, 58, 61, 64) and open ocean (st. 14, 24, 26) stations, indicated as water depth (meters) and corresponding potential density ( $\sigma_\theta$ ,  $\text{kg m}^{-3}$ ), oxygen concentration ( $\text{O}_2$ ,  $\mu\text{mol kg}^{-1}$ ), nitrate, ( $\text{NO}_3^-$ ,  $\mu\text{M}$ ), nitrite, ( $\text{NO}_2^-$ ,  $\mu\text{M}$ ) and ammonium, ( $\text{NH}_4^+$ ,  $\mu\text{M}$ ).

| Station | Depth (m) | Estimated potential density ( $\sigma_\theta$ ) | $\text{O}_2$                | $\text{NO}_3^-$   | $\text{NO}_2^-$   | $\text{NH}_4^+$   |
|---------|-----------|-------------------------------------------------|-----------------------------|-------------------|-------------------|-------------------|
|         |           | ( $\text{kg m}^{-3}$ )                          | ( $\mu\text{mol kg}^{-1}$ ) | ( $\mu\text{M}$ ) | ( $\mu\text{M}$ ) | ( $\mu\text{M}$ ) |
| 48      | 20        | 25.63                                           | 211.8                       | 4.2               | 0.2               | 0.54              |
|         | 94        | 26.27                                           | 2.1                         | 11.9              | 3.8               | 0.06              |
|         | 198       | 26.47                                           | 2.2                         | 15.7              | 6.7               | 0.05              |
|         | 230       | 26.50                                           | 2.3                         | 17.1              | 6.5               | 0.03              |
|         | 300       | 26.61                                           | 2.4                         | 21.2              | 6.7               | 0.04              |
|         | 500       | 26.95                                           | 14.7                        | 41.2              | 0.0               | 0.06              |
| 54      | 30        | 25.85                                           | 123.1                       | 11.4              | 0.5               | 1.48              |
|         | 70        | 26.19                                           | 2.1                         | 13.6              | 2.8               | 0.08              |
|         | 115       | 26.31                                           | 2.1                         | 9.7               | 5.6               | 0.03              |
|         | 125       | 26.33                                           | 2.2                         | 9.9               | 5.6               | 0.03              |
|         | 281       | 26.50                                           | 2.3                         | 16.4              | 6.6               | 0.05              |
|         | 301       | 26.54                                           | 2.3                         | 17.9              | 6.5               | 0.02              |
|         | 323       | 26.60                                           | 2.4                         | 21.0              | 5.6               | 0.02              |
|         | 370       | 26.71                                           | 2.5                         | 30.7              | 1.0               | 0.04              |
| 58      | 11        | 25.62                                           | 212                         | 3.5               | 0.1               | 0.32              |
|         | 19        | 25.61                                           | 214                         | 4.3               | 0.2               | 0.35              |
|         | 41        | 25.83                                           | 107                         | 15.1              | 0.5               | 1.04              |
|         | 51        | 25.96                                           | 44                          | 19.5              | 0.6               | 0.70              |
|         | 90        | 26.27                                           | 2                           | 11.8              | 3.5               | 0.02              |
|         | 100       | 26.30                                           | 2                           | 10.2              | 5.3               | 0.03              |
|         | 115       | 26.34                                           | 2                           | 8.8               | 7.5               | 0.05              |
|         | 200       | 26.42                                           | 2                           | 13.5              | 7.2               | 0.12              |
|         | 998       | 27.38                                           | 65                          | 43.5              | 0.0               | 0.12              |
| 61      | 15        | 25.63                                           | 216                         | 3.7               | 0.1               | 0.45              |
|         | 29        | 25.69                                           | 192                         | 6.9               | 0.2               | 0.83              |
|         | 60        | 26.05                                           | 21                          | 22.2              | 0.1               | 0.01              |
|         | 79        | 26.19                                           | 2                           | 15.2              | 1.6               | 0.02              |
|         | 100       | 26.30                                           | 2                           | 10.8              | 5.0               | 0.01              |
| 64      | 2         | 25.58                                           | 220                         | 3.2               | 0.1               | 0.18              |
|         | 15        | 25.61                                           | 217                         | 3.6               | 0.1               | 0.36              |
|         | 20        | 25.64                                           | 211                         | 4.0               | 0.1               | 0.47              |
|         | 25        | 25.66                                           | 201                         | 5.5               | 0.2               | 0.61              |

|    |      |       |       |      |      |      |
|----|------|-------|-------|------|------|------|
|    | 29   | 25.72 | 181   | 8.5  | 0.2  | 0.70 |
|    | 40   | 25.97 | 43    | 21.8 | 0.3  | 0.09 |
|    | 50   | 26.10 | 4     | 20.5 | 0.2  | 0.01 |
|    | 60   | 26.17 | 2     | 15.9 | 1.6  | 0.02 |
|    | 150  | 26.40 | 2     | 12.8 | 7.4  | 0.03 |
|    | 239  | 26.46 | 2     | 15.6 | 7.2  | 0.02 |
|    | 250  | 26.48 | 2     | 16.2 | 7.1  | 0.06 |
|    | 325  | 26.59 | 2     | 20.8 | 6.6  | 0.01 |
|    | 375  | 26.73 | 3     | 32.3 | 0.3  | 0.03 |
|    | 2    | 25.37 | 214.1 | 2.6  | 0.20 | 0.20 |
|    | 29   | 25.37 | 214.0 | 2.6  | 0.20 | 0.20 |
|    | 35   | 25.37 | 213.3 | 2.6  | 0.20 | 0.20 |
|    | 40   | 25.37 | 213.4 | 2.6  | 0.21 | 0.20 |
|    | 64   | 25.46 | 191.7 | 5.5  | 0.23 | 0.26 |
|    | 74   | 25.69 | 142.0 | 15.2 | 0.13 | 0.02 |
|    | 159  | 26.37 | 2.3   | 19.6 | 0.60 | 0.00 |
| 14 | 250  | 26.55 | 2.3   | 20.0 | 6.73 | 0.01 |
|    | 500  | 26.99 | 15.9  | 42.3 | 0.02 | 0.02 |
|    | 699  | 27.19 | 23.4  | 45.7 | 0.02 | 0.04 |
|    | 900  | 27.33 | 46.4  | 44.9 | 0.01 | 0.03 |
|    | 900  | 27.33 | 46.4  | 44.8 | 0.02 | 0.04 |
|    | 1000 | 27.39 | 55.7  | 44.1 | 0.01 | 0.02 |
|    | 1300 | 27.53 | 76.2  | 42.3 | 0.02 | 0.02 |
|    | 1401 | 27.56 | 81.1  | 41.9 | 0.02 | 0.06 |
|    | 3    | 25.39 | 213.4 | 2.5  | 0.23 | 0.49 |
|    | 20   | 25.38 | 212.8 | 2.5  | 0.22 | 0.50 |
|    | 49   | 25.39 | 211.3 | 2.5  | 0.23 | 0.54 |
|    | 79   | 25.92 | 93.2  | 20.7 | 0.06 | 0.06 |
|    | 98   | 26.10 | 36.4  | 23.6 | 0.03 | 0.01 |
|    | 124  | 26.25 | 5.5   | 19.9 | 0.03 | 0.06 |
|    | 151  | 26.35 | 2.1   | 19.8 | 0.34 | 0.01 |
|    | 201  | 26.49 |       | 23.0 | 1.68 | 0.03 |
|    | 249  | 26.58 |       | 25.2 | 3.00 | 0.01 |
| 24 | 300  | 26.69 |       | 28.2 | 3.96 | 0.02 |
|    | 350  | 26.77 |       | 35.7 | 0.04 | 0.02 |
|    | 399  | 26.85 |       | 38.8 | 0.01 | 0.02 |
|    | 500  | 27.01 |       | 43.0 | 0.01 | 0.03 |
|    | 599  | 27.12 |       | 45.0 | 0.01 | 0.04 |
|    | 800  | 27.28 |       | 45.7 | 0.01 | 0.04 |
|    | 879  | 27.34 |       | 45.0 | 0.00 | 0.03 |
|    | 1248 | 27.51 |       | 42.8 | 0.00 | 0.01 |
|    | 1498 | 27.58 |       | 41.9 | 0.00 | 0.04 |
|    | 1748 | 27.64 |       | 40.8 | 0.00 | 0.02 |

|      |       |       |      |      |      |
|------|-------|-------|------|------|------|
| 2000 | 27.68 |       | 40.0 | 0.00 | 0.03 |
| 2251 | 27.71 |       | 39.1 | 0.00 | 0.04 |
| 2501 | 27.73 |       | 38.4 | 0.00 | 0.03 |
| 2999 | 27.75 |       | 38.3 | 0.00 | 0.02 |
| 3501 | 27.75 |       | 37.6 | 0.00 | 0.02 |
| 2    | 25.22 | 216.2 | 4.6  | 0.37 | 0.40 |
| 51   | 25.26 | 212.4 | 2.5  | 0.22 | 0.38 |
| 101  | 26.06 | 2.8   | 20.9 | 0.04 | 0.03 |
| 124  | 26.18 | 2.1   | 9.4  | 8.84 | 0.01 |
| 147  | 26.27 | 2.1   | 10.0 | 7.97 | 0.01 |
| 175  | 26.35 | 2.1   | 14.7 | 4.33 | 0.02 |
| 199  | 26.41 | 2.2   | 16.8 | 4.77 | 0.02 |
| 226  | 26.47 | 2.2   | 20.1 | 5.44 | 0.01 |
| 239  | 26.50 | 2.2   | 20.2 | 5.86 | 0.01 |
| 252  | 26.53 | 2.2   | 21.6 | 5.91 | 0.02 |
| 258  | 26.54 | 2.3   | 18.7 | 8.60 | 0.09 |
| 270  | 26.56 | 2.3   | 18.8 | 8.81 | 0.02 |
| 273  | 26.57 | 2.3   | 18.9 | 8.86 | 0.02 |
| 280  | 26.59 | 2.3   | 20.6 | 7.99 | 0.02 |
| 289  | 26.61 | 2.3   | 23.2 | 6.54 | 0.02 |
| 301  | 26.62 | 2.4   | 24.4 | 6.01 | 0.02 |
| 350  | 26.72 | 2.5   | 32.9 | 1.02 | 0.00 |
| 398  | 26.82 | 3.8   | 37.9 | 0.02 | 0.05 |
| 500  | 26.98 | 11.4  | 41.8 | 0.01 | 0.02 |
| 600  | 27.09 | 19.9  | 44.1 | 0.01 | 0.04 |
| 799  | 27.26 | 32.1  | 45.7 | 0.00 | 0.02 |
| 1001 | 27.37 | 52.9  | 44.4 | 0.00 | 0.05 |
| 1252 | 27.49 | 69.7  | 42.9 | 0.00 | 0.34 |
| 1500 | 27.59 | 81.1  | 41.9 | 0.00 | 0.03 |

**Table S3.** Estimations of the archaeal 16S rRNA gene reads (copies L<sup>-1</sup>) of specific archaeal groups detected in the ETSP SPM at (a) the coastal station and at the (b) open ocean station, obtained as described in the experimental procedures.

(a)

| Depth (m) | MGI<br><i>Ca.Nitrosopelagicus</i> | MGI<br><i>Nitrosopumilus</i> | MGI<br>uncultured<br>OTU-1 | MGI<br>uncultured<br>OTU-2 | MGI<br>uncultured<br>OTU-1 | MGI<br>uncultured<br>OTU-2 | MGI<br>uncultured<br>OTU-1 | MGI<br>uncultured<br>OTU-2 | MGI<br>uncultured<br>OTU-3 | MGI<br>uncultured<br>OTU-3 | DPANN<br>Woesearchaeota<br>DHVE-6 |
|-----------|-----------------------------------|------------------------------|----------------------------|----------------------------|----------------------------|----------------------------|----------------------------|----------------------------|----------------------------|----------------------------|-----------------------------------|
| 22        | 8.4E+04                           | 3.7E+04                      | 2.8E+03                    | 2.5E+03                    | 1.0E+04                    | 1.0E+04                    | 0.0E+00                    | 3.8E+03                    | 9.4E+02                    | 3.1E+02                    |                                   |
| *60       | 0.0E+00                           | 0.0E+00                      | 0.0E+00                    | 0.0E+00                    | 0.0E+00                    | 0.0E+00                    | 0.0E+00                    | 0.0E+00                    | 0.0E+00                    | 0.0E+00                    |                                   |
| 75        | 4.2E+05                           | 4.7E+05                      | 6.0E+04                    | 2.4E+04                    | 1.0E+06                    | 1.5E+05                    | 6.0E+03                    | 1.8E+05                    | 6.6E+04                    | 5.4E+04                    |                                   |
| 83        | 1.0E+06                           | 1.4E+06                      | 1.4E+05                    | 3.9E+04                    | 6.3E+05                    | 1.7E+05                    | 2.6E+04                    | 6.6E+04                    | 1.2E+05                    | 6.6E+04                    |                                   |
| 100       | 7.0E+05                           | 1.1E+06                      | 6.8E+05                    | 3.4E+05                    | 4.2E+05                    | 3.8E+05                    | 1.9E+05                    | 3.8E+05                    | 1.0E+06                    | 7.5E+05                    |                                   |
| 135       | 1.9E+05                           | 2.8E+05                      | 3.8E+05                    | 1.7E+05                    | 3.4E+04                    | 1.9E+05                    | 3.6E+05                    | 3.5E+05                    | 1.1E+06                    | 1.1E+06                    |                                   |
| 150       | 3.4E+04                           | 8.4E+04                      | 1.3E+05                    | 5.0E+04                    | 0.0E+00                    | 2.9E+05                    | 2.2E+05                    | 2.7E+05                    | 8.0E+05                    | 6.2E+05                    |                                   |
| 175       | 2.7E+05                           | 3.4E+05                      | 9.9E+05                    | 7.6E+05                    | 5.7E+05                    | 7.6E+05                    | 1.4E+06                    | 1.4E+06                    | 3.0E+06                    | 3.2E+06                    |                                   |
| 200       | 2.4E+05                           | 2.4E+05                      | 1.8E+06                    | 6.4E+05                    | 0.0E+00                    | 9.7E+05                    | 2.7E+06                    | 2.1E+06                    | 4.6E+06                    | 3.2E+06                    |                                   |
| 235       | 1.5E+05                           | 1.5E+05                      | 1.5E+05                    | 1.5E+05                    | 0.0E+00                    | 1.5E+05                    | 1.5E+06                    | 1.3E+06                    | 3.2E+06                    | 1.9E+06                    |                                   |
| 250       | 0.0E+00                           | 7.3E+05                      | 2.3E+06                    | 7.3E+05                    | 1.2E+06                    | 8.5E+05                    | 3.3E+06                    | 1.3E+06                    | 5.0E+06                    | 5.9E+06                    |                                   |
| 300       | 0.0E+00                           | 7.6E+04                      | 9.1E+05                    | 7.6E+05                    | 7.6E+04                    | 4.5E+05                    | 2.3E+06                    | 2.0E+06                    | 4.9E+06                    | 2.6E+06                    |                                   |
| 350       | 4.1E+04                           | 2.9E+05                      | 6.2E+05                    | 3.3E+05                    | 0.0E+00                    | 6.2E+05                    | 2.7E+06                    | 1.7E+06                    | 3.4E+06                    | 1.9E+06                    |                                   |
| 500       | 1.4E+04                           | 2.6E+05                      | 1.3E+06                    | 1.7E+06                    | 1.9E+04                    | 1.8E+06                    | 7.2E+04                    | 1.0E+05                    | 2.6E+05                    | 1.4E+04                    |                                   |
| 1000      | 0.0E+00                           | 2.0E+05                      | 9.6E+05                    | 9.2E+05                    | 1.8E+04                    | 1.0E+06                    | 6.1E+04                    | 6.1E+04                    | 2.5E+05                    | 1.8E+04                    |                                   |

\*Samples from 60 m depth were not included into the Pearson correlation analysis

(b)

| Depth<br>(m) | MGI<br><i>Ca.Nitrosopelagicus</i> | MGI<br><i>Nitrosopumilus</i> | MGI<br>uncultured<br>OTU-1 | MGI<br>uncultured<br>OTU-2 | MGII<br>uncultured<br>OTU-1 | MGII<br>uncultured<br>OTU-2 | MGII<br>uncultured<br>OTU-3 | MGIII<br>uncultured<br>OTU-1 | MGIII<br>uncultured<br>OTU-2 | MGIII<br>uncultured<br>OTU-3 | DPANN<br>Woesearchaeota<br>DHVE-6 |
|--------------|-----------------------------------|------------------------------|----------------------------|----------------------------|-----------------------------|-----------------------------|-----------------------------|------------------------------|------------------------------|------------------------------|-----------------------------------|
| 100          | 1.2E+06                           | 5.8E+05                      | 5.0E+05                    | 7.8E+04                    | 1.4E+05                     | 6.6E+05                     | 2.0E+05                     | 0.0E+00                      | 1.8E+05                      | 6.1E+04                      | 0.0E+00                           |
| 125          | 4.2E+06                           | 3.4E+06                      | 3.6E+06                    | 3.0E+05                    | 6.8E+05                     | 3.1E+06                     | 1.0E+06                     | 2.3E+04                      | 1.4E+06                      | 4.1E+05                      | 6.8E+04                           |
| 155          | 8.6E+05                           | 2.4E+06                      | 3.8E+06                    | 6.2E+04                    | 7.4E+05                     | 2.6E+06                     | 5.9E+05                     | 1.2E+06                      | 1.6E+06                      | 2.1E+06                      | 1.7E+06                           |
| 175          | 1.9E+05                           | 5.8E+05                      | 2.2E+06                    | 1.9E+05                    | 1.9E+05                     | 1.8E+06                     | 0.0E+00                     | 6.8E+06                      | 5.4E+06                      | 1.1E+07                      | 1.1E+07                           |
| 200          | 9.2E+05                           | 3.2E+06                      | 1.1E+07                    | 1.1E+05                    | 1.1E+06                     | 5.3E+06                     | 6.9E+05                     | 1.0E+07                      | 5.3E+06                      | 1.6E+07                      | 1.1E+07                           |
| 235          | 1.1E+05                           | 2.2E+05                      | 8.7E+05                    | 0.0E+00                    | 1.1E+05                     | 2.2E+05                     | 0.0E+00                     | 5.0E+06                      | 3.0E+06                      | 4.3E+06                      | 3.0E+06                           |
| 300          | 0.0E+00                           | 9.7E+03                      | 1.5E+05                    | 9.7E+03                    | 0.0E+00                     | 9.7E+04                     | 0.0E+00                     | 9.0E+05                      | 4.2E+05                      | 6.5E+05                      | 4.9E+05                           |
| 500          | 1.3E+05                           | 0.0E+00                      | 1.4E+07                    | 7.3E+05                    | 3.7E+06                     | 3.4E+06                     | 3.5E+05                     | 6.1E+05                      | 7.7E+05                      | 1.5E+06                      | 2.9E+05                           |
| 1000         | 2.9E+02                           | 0.0E+00                      | 7.2E+04                    | 1.4E+04                    | 3.5E+04                     | 9.8E+03                     | 8.6E+02                     | 7.5E+03                      | 1.7E+03                      | 1.4E+04                      | 2.6E+03                           |

**Table S4.** Abundances of the archaeal IPLs (response units per Liter; r.u. L<sup>-1</sup>) detected in the ETSP SPM at **(a)** the coastal station and at the **(b)** open ocean station.

(a)

| Depth<br>(m) | GDGT-0  |         |         | GDGT-1  |         |         | GDGT-2  |         |         | GDGT-3  | GDGT-4  | Crenarchaeol |         |         | Archaeol |         |         |         |
|--------------|---------|---------|---------|---------|---------|---------|---------|---------|---------|---------|---------|--------------|---------|---------|----------|---------|---------|---------|
|              | MH      | DH      | HPH     | MH      | DH      | HPH     | MH      | DH      | HPH     | DH      | DH      | MH           | DH      | HPH     | MH       | DH      | PG      | PE      |
| 22           | 1.6E+04 | 0.0E+00 | 0.0E+00 | 0.0E+00 | 0.0E+00 | 0.0E+00 | 0.0E+00 | 1.3E+05 | 0.0E+00 | 0.0E+00 | 0.0E+00 | 4.4E+04      | 0.0E+00 | 0.0E+00 | 0.0E+00  | 0.0E+00 | 0.0E+00 | 0.0E+00 |
| *60          | 1.7E+06 | 8.3E+06 | 1.0E+08 | 2.0E+05 | 2.3E+07 | 5.9E+06 | 6.1E+04 | 4.4E+07 | 1.2E+06 | 9.8E+06 | 2.4E+06 | 2.4E+06      | 1.0E+07 | 6.7E+07 | 0.0E+00  | 0.0E+00 | 4.3E+06 | 1.6E+06 |
| 75           | 3.7E+06 | 9.1E+06 | 3.1E+08 | 4.4E+05 | 3.0E+07 | 2.7E+07 | 1.8E+05 | 4.9E+07 | 6.5E+06 | 1.2E+07 | 5.6E+06 | 3.5E+06      | 6.7E+06 | 2.5E+08 | 0.0E+00  | 0.0E+00 | 2.4E+07 | 2.6E+06 |
| 83           | 3.1E+06 | 1.0E+07 | 3.6E+08 | 4.9E+05 | 3.5E+07 | 3.7E+07 | 1.4E+05 | 5.7E+07 | 6.9E+06 | 1.2E+07 | 3.5E+06 | 5.0E+06      | 1.0E+07 | 2.9E+08 | 0.0E+00  | 0.0E+00 | 1.9E+07 | 2.8E+06 |
| 100          | 5.2E+05 | 2.8E+06 | 9.2E+07 | 6.8E+04 | 9.4E+06 | 7.9E+06 | 2.5E+04 | 1.6E+07 | 1.1E+06 | 1.6E+06 | 7.1E+05 | 1.1E+06      | 3.3E+06 | 6.5E+07 | 2.4E+04  | 8.4E+05 | 2.9E+07 | 5.7E+06 |
| 135          | 4.0E+05 | 2.2E+06 | 8.5E+07 | 8.0E+04 | 5.1E+06 | 1.2E+07 | 1.2E+04 | 1.4E+07 | 2.8E+06 | 5.7E+05 | 2.6E+05 | 1.1E+06      | 3.6E+06 | 7.7E+07 | 1.5E+05  | 2.2E+06 | 7.5E+07 | 1.2E+07 |
| 150          | 1.8E+05 | 2.7E+05 | 8.0E+06 | 4.9E+04 | 1.1E+06 | 0.0E+00 | 1.8E+04 | 3.6E+06 | 0.0E+00 | 0.0E+00 | 0.0E+00 | 6.3E+05      | 0.0E+00 | 8.0E+06 | 1.6E+05  | 6.5E+05 | 3.0E+07 | 7.3E+06 |
| 175          | 3.5E+05 | 0.0E+00 | 1.5E+07 | 7.7E+04 | 3.1E+06 | 1.4E+06 | 1.6E+04 | 6.2E+06 | 0.0E+00 | 0.0E+00 | 0.0E+00 | 9.3E+05      | 1.8E+06 | 1.1E+07 | 2.6E+05  | 1.2E+06 | 4.1E+07 | 1.1E+07 |
| 200          | 1.3E+05 | 7.0E+05 | 7.6E+06 | 4.1E+04 | 2.3E+06 | 0.0E+00 | 1.1E+04 | 7.5E+06 | 0.0E+00 | 0.0E+00 | 0.0E+00 | 6.9E+05      | 1.7E+06 | 8.4E+06 | 3.4E+05  | 2.4E+06 | 6.8E+07 | 1.7E+07 |
| 235          | 1.4E+05 | 0.0E+00 | 1.4E+07 | 3.6E+04 | 1.3E+06 | 1.3E+06 | 1.5E+04 | 4.4E+06 | 0.0E+00 | 0.0E+00 | 0.0E+00 | 3.9E+05      | 1.2E+06 | 9.9E+06 | 2.3E+05  | 1.0E+06 | 4.7E+07 | 8.0E+06 |
| 250          | 1.3E+05 | 0.0E+00 | 5.9E+06 | 2.3E+04 | 6.7E+05 | 2.2E+05 | 5.1E+03 | 3.0E+06 | 0.0E+00 | 0.0E+00 | 0.0E+00 | 3.7E+05      | 8.3E+05 | 5.8E+06 | 2.2E+05  | 1.5E+06 | 4.0E+07 | 1.0E+07 |
| 300          | 7.7E+04 | 6.9E+04 | 2.5E+07 | 2.0E+04 | 8.2E+05 | 2.8E+06 | 3.9E+03 | 3.9E+06 | 0.0E+00 | 0.0E+00 | 4.4E+04 | 3.5E+05      | 5.4E+05 | 2.1E+07 | 2.9E+05  | 1.3E+06 | 6.6E+07 | 1.1E+07 |
| 350          | 1.1E+05 | 0.0E+00 | 1.1E+07 | 3.3E+04 | 1.1E+06 | 1.0E+06 | 8.2E+03 | 3.8E+06 | 0.0E+00 | 0.0E+00 | 0.0E+00 | 4.5E+05      | 7.3E+05 | 9.2E+06 | 3.1E+05  | 1.5E+06 | 7.4E+07 | 8.6E+06 |
| 500          | 1.6E+05 | 3.1E+06 | 9.6E+07 | 3.8E+04 | 8.0E+06 | 2.1E+07 | 1.3E+04 | 2.0E+07 | 5.4E+06 | 1.7E+05 | 2.5E+05 | 3.9E+05      | 1.1E+07 | 7.3E+07 | 2.3E+03  | 0.0E+00 | 3.4E+06 | 6.7E+05 |
| 1000         | 6.3E+05 | 4.2E+06 | 4.3E+07 | 1.5E+05 | 1.0E+07 | 5.7E+06 | 1.7E+04 | 2.7E+07 | 0.0E+00 | 1.2E+05 | 5.5E+05 | 7.6E+05      | 6.9E+06 | 1.8E+07 | 1.9E+03  | 0.0E+00 | 5.7E+06 |         |

\*Samples from 60 m depth were not included into the Pearson correlation analysis



(b)

| Depth<br>(m) | GDGT-0  |         |         | GDGT-1  |         |         | GDGT-2  |         |         | GDGT-3  | GDGT-4  | Crenarchaeol |         |         | Archaeol |         |         |         |
|--------------|---------|---------|---------|---------|---------|---------|---------|---------|---------|---------|---------|--------------|---------|---------|----------|---------|---------|---------|
|              | MH      | DH      | HPH     | MH      | DH      | HPH     | MH      | DH      | HPH     | DH      | DH      | MH           | DH      | HPH     | MH       | DH      | PG      | PE      |
| 100          | 8.3E+05 | 1.6E+06 | 4.5E+07 | 1.2E+05 | 1.0E+07 | 3.2E+06 | 5.4E+04 | 2.5E+07 | 0.0E+00 | 2.6E+06 | 5.0E+05 | 1.7E+06      | 9.8E+06 | 3.1E+07 | 0.0E+00  | 0.0E+00 | 3.1E+06 | 1.7E+06 |
| 125          | 6.5E+05 | 2.5E+06 | 1.3E+08 | 1.2E+05 | 8.2E+06 | 1.5E+07 | 5.5E+04 | 2.0E+07 | 2.0E+06 | 2.5E+06 | 5.4E+05 | 1.0E+06      | 7.5E+06 | 1.1E+08 | 0.0E+00  | 0.0E+00 | 3.6E+06 | 8.7E+05 |
| 155          | 2.9E+05 | 8.7E+05 | 2.0E+07 | 5.2E+04 | 3.4E+06 | 1.9E+06 | 2.5E+04 | 8.3E+06 | 1.2E+05 | 5.3E+05 | 2.0E+05 | 5.8E+05      | 2.3E+06 | 1.6E+07 | 3.4E+04  | 6.8E+04 | 7.0E+06 | 1.3E+06 |
| 175          | 2.9E+05 | 6.7E+05 | 1.7E+06 | 3.3E+04 | 1.1E+06 | 0.0E+00 | 1.7E+04 | 5.5E+06 | 0.0E+00 | 0.0E+00 | 0.0E+00 | 5.3E+05      | 2.2E+06 | 9.0E+05 | 1.6E+05  | 6.4E+05 | 3.4E+07 | 4.2E+06 |
| 200          | 1.8E+05 | 8.3E+05 | 2.3E+07 | 3.3E+04 | 1.8E+06 | 3.5E+06 | 2.3E+04 | 8.5E+06 | 3.1E+05 | 3.7E+05 | 1.6E+05 | 5.9E+05      | 2.5E+06 | 2.6E+07 | 1.8E+05  | 4.7E+05 | 4.3E+07 | 3.6E+06 |
| 235          | 5.9E+04 | 1.2E+05 | 6.2E+06 | 9.9E+03 | 1.1E+06 | 0.0E+00 | 6.0E+03 | 3.1E+06 | 0.0E+00 | 5.8E+04 | 0.0E+00 | 2.4E+05      | 6.6E+05 | 5.6E+06 | 1.5E+05  | 4.3E+05 | 2.9E+07 | 5.6E+06 |
| 300          | 1.9E+05 | 8.2E+05 | 8.0E+06 | 4.4E+04 | 2.0E+06 | 8.7E+05 | 2.4E+04 | 7.1E+06 | 6.6E+04 | 0.0E+00 | 0.0E+00 | 5.2E+05      | 2.2E+06 | 9.3E+06 | 2.1E+05  | 8.4E+05 | 4.5E+07 | 4.0E+06 |
| 500          | 1.2E+05 | 3.0E+06 | 8.5E+07 | 2.5E+04 | 8.0E+06 | 1.8E+07 | 3.7E+03 | 2.7E+07 | 5.1E+06 | 2.7E+05 | 3.0E+05 | 2.1E+05      | 1.2E+07 | 5.7E+07 | 0.0E+00  | 0.0E+00 | 2.7E+06 | 9.2E+05 |
| 1000         | 3.4E+05 | 2.7E+06 | 2.4E+07 | 9.6E+04 | 8.2E+06 | 4.0E+06 | 4.8E+04 | 2.2E+07 | 4.0E+05 | 2.0E+05 | 0.0E+00 | 4.5E+05      | 5.1E+06 | 9.4E+06 | 0.0E+00  | 0.0E+00 | 8.7E+06 | 1.2E+06 |

**Table S5.** Values of the Pearson correlation coefficients (r values) obtained from the correlation matrix created using as variables the total archaeal 16S rRNA gene reads of the archaeal groups (copies L<sup>-1</sup>) and the absolute abundance of the archaeal IPLs (response units per Liter; r.u. L<sup>-1</sup>) detected in the ETSP at the **(a)** coastal and **(b)** open ocean stations.

**(a)**

|                                | GDGT-0 |       |       | GDGT-1 |       |       | GDGT-2 |       |       | GDGT-3 | GDGT-4 | Crenarchaeol |       |       | Archaeol |       |       |       |
|--------------------------------|--------|-------|-------|--------|-------|-------|--------|-------|-------|--------|--------|--------------|-------|-------|----------|-------|-------|-------|
|                                | MH     | DH    | HPH   | MH     | DH    | HPH   | MH     | DH    | HPH   | DH     | DH     | MH           | DH    | HPH   | MH       | DH    | PG    | PE    |
| MGI <i>Ca.Nitrosopelagicus</i> | 0.68   | 0.70  | 0.77  | 0.72   | 0.77  | 0.67  | 0.67   | 0.70  | 0.58  | 0.74   | 0.61   | 0.83         | 0.46  | 0.76  | -0.38    | -0.22 | -0.15 | -0.16 |
| MGI <i>Nitrosopumilus</i>      | 0.55   | 0.60  | 0.65  | 0.59   | 0.66  | 0.59  | 0.52   | 0.61  | 0.50  | 0.61   | 0.48   | 0.69         | 0.45  | 0.63  | -0.34    | -0.16 | -0.16 | -0.15 |
| MGI uncultured OTU-1           | -0.39  | -0.33 | -0.38 | -0.38  | -0.35 | -0.30 | -0.40  | -0.30 | -0.28 | -0.40  | -0.39  | -0.37        | -0.06 | -0.39 | 0.41     | 0.43  | 0.19  | 0.46  |
| MGI uncultured OTU-2           | -0.37  | -0.18 | -0.27 | -0.34  | -0.24 | -0.05 | -0.38  | -0.14 | -0.02 | -0.40  | -0.35  | -0.38        | 0.34  | -0.29 | 0.06     | -0.01 | -0.15 | 0.02  |
| MGII uncultured OTU-1          | 0.56   | 0.42  | 0.48  | 0.50   | 0.48  | 0.35  | 0.56   | 0.41  | 0.36  | 0.55   | 0.57   | 0.49         | 0.17  | 0.48  | -0.16    | -0.13 | -0.15 | -0.06 |
| MGII uncultured OTU-2          | -0.33  | -0.14 | -0.25 | -0.29  | -0.20 | -0.04 | -0.33  | -0.09 | 0.00  | -0.36  | -0.31  | -0.33        | 0.36  | -0.27 | 0.07     | 0.02  | -0.15 | 0.04  |
| MGIII uncultured OTU-1         | -0.42  | -0.56 | -0.49 | -0.43  | -0.50 | -0.54 | -0.40  | -0.53 | -0.53 | -0.40  | -0.42  | -0.39        | -0.56 | -0.47 | 0.87     | 0.71  | 0.68  | 0.74  |
| MGIII uncultured OTU-2         | -0.42  | -0.57 | -0.48 | -0.43  | -0.50 | -0.55 | -0.39  | -0.53 | -0.54 | -0.40  | -0.41  | -0.38        | -0.57 | -0.46 | 0.94     | 0.73  | 0.77  | 0.81  |
| MGIII uncultured OTU-3         | -0.46  | -0.61 | -0.52 | -0.48  | -0.54 | -0.58 | -0.44  | -0.57 | -0.57 | -0.44  | -0.46  | -0.42        | -0.59 | -0.50 | 0.91     | 0.73  | 0.71  | 0.80  |
| DPANN Woese archaeota          | -0.39  | -0.54 | -0.46 | -0.41  | -0.48 | -0.52 | -0.38  | -0.51 | -0.50 | -0.38  | -0.40  | -0.35        | -0.53 | -0.44 | 0.75     | 0.67  | 0.54  | 0.72  |

(b)

|                                | GDGT-0 |       |       | GDGT-1 |       |       | GDGT-2 |       |       | GDGT-3 | GDGT-4 | Crenarchaeol |       |       | Archaeol |       |       |       |
|--------------------------------|--------|-------|-------|--------|-------|-------|--------|-------|-------|--------|--------|--------------|-------|-------|----------|-------|-------|-------|
|                                | MH     | DH    | HPH   | MH     | DH    | HPH   | MH     | DH    | HPH   | DH     | DH     | MH           | DH    | HPH   | MH       | DH    | PG    | PE    |
| MGI <i>Ca.Nitrosopelagicus</i> | 0.64   | 0.30  | 0.80  | 0.64   | 0.39  | 0.49  | 0.61   | 0.26  | 0.14  | 0.80   | 0.77   | 0.52         | 0.29  | 0.87  | -0.39    | -0.40 | -0.39 | -0.43 |
| MGI <i>Nitrosopumilus</i>      | 0.26   | -0.04 | 0.41  | 0.24   | -0.05 | 0.20  | 0.30   | -0.13 | -0.06 | 0.41   | 0.46   | 0.25         | -0.11 | 0.53  | -0.06    | -0.19 | -0.04 | -0.24 |
| MGI uncultured OTU-1           | -0.35  | 0.30  | 0.35  | -0.38  | 0.03  | 0.61  | -0.44  | 0.24  | 0.71  | -0.14  | 0.23   | -0.31        | 0.39  | 0.34  | -0.08    | -0.18 | -0.05 | -0.24 |
| MGI uncultured OTU-2           | -0.10  | 0.61  | 0.64  | -0.13  | 0.36  | 0.87  | -0.30  | 0.54  | 0.96  | 0.07   | 0.41   | -0.20        | 0.73  | 0.56  | -0.39    | -0.36 | -0.40 | -0.44 |
| MGII uncultured OTU-1          | -0.30  | 0.51  | 0.47  | -0.30  | 0.25  | 0.77  | -0.45  | 0.46  | 0.92  | -0.10  | 0.30   | -0.33        | 0.62  | 0.40  | -0.32    | -0.35 | -0.32 | -0.40 |
| MGII uncultured OTU-2          | -0.10  | 0.13  | 0.39  | -0.16  | -0.07 | 0.46  | -0.17  | 0.05  | 0.41  | 0.08   | 0.36   | -0.07        | 0.17  | 0.45  | -0.02    | -0.15 | 0.01  | -0.24 |
| MGII uncultured OTU-3          | 0.31   | 0.28  | 0.71  | 0.32   | 0.23  | 0.56  | 0.31   | 0.19  | 0.31  | 0.53   | 0.68   | 0.25         | 0.24  | 0.79  | -0.33    | -0.42 | -0.31 | -0.49 |
| MGIII uncultured OTU-1         | -0.45  | -0.60 | -0.45 | -0.59  | -0.71 | -0.39 | -0.46  | -0.63 | -0.30 | -0.42  | -0.40  | -0.29        | -0.55 | -0.35 | 0.71     | 0.55  | 0.71  | 0.65  |
| MGIII uncultured OTU-2         | -0.36  | -0.58 | -0.34 | -0.53  | -0.71 | -0.32 | -0.44  | -0.65 | -0.26 | -0.34  | -0.32  | -0.26        | -0.53 | -0.23 | 0.63     | 0.50  | 0.60  | 0.59  |
| MGIII uncultured OTU-3         | -0.37  | -0.50 | -0.38 | -0.51  | -0.64 | -0.31 | -0.39  | -0.54 | -0.24 | -0.37  | -0.32  | -0.23        | -0.46 | -0.28 | 0.63     | 0.49  | 0.65  | 0.52  |
| DPANN Woesearchaeota           | -0.33  | -0.53 | -0.43 | -0.49  | -0.66 | -0.38 | -0.37  | -0.57 | -0.30 | -0.37  | -0.36  | -0.21        | -0.50 | -0.33 | 0.64     | 0.53  | 0.66  | 0.54  |

**Table S6.** Values of the Pearson correlation coefficients (r values) obtained from the correlation matrix created using as variables the total archaeal 16S rRNA gene reads of the archaeal groups (copies L<sup>-1</sup>) detected in the ETSP at the (a) coastal and (b) open ocean stations.

| (a)                            | Thaumarchaeota Marine Group I |                       |                  |                  | Euryarchaeota Marine Group II |                  | Euryarchaeota Marine Group III |                  |                  | DPANN                 |
|--------------------------------|-------------------------------|-----------------------|------------------|------------------|-------------------------------|------------------|--------------------------------|------------------|------------------|-----------------------|
|                                | <i>Ca.Nitrosopelagicus</i>    | <i>Nitrosopumilus</i> | uncultured OTU-1 | uncultured OTU-2 | uncultured OTU-1              | uncultured OTU-2 | uncultured OTU-1               | uncultured OTU-2 | uncultured OTU-3 | Woesearchaeota DHVE-6 |
| MGI <i>Ca.Nitrosopelagicus</i> |                               |                       |                  |                  |                               |                  |                                |                  |                  |                       |
| MGI <i>Nitrosopumilus</i>      | 0.86                          |                       |                  |                  |                               |                  |                                |                  |                  |                       |
| MGI uncultured OTU-1           | -0.32                         | 0.05                  |                  |                  |                               |                  |                                |                  |                  |                       |
| MGI uncultured OTU-2           | -0.40                         | -0.17                 | 0.69             |                  |                               |                  |                                |                  |                  |                       |
| MGII uncultured OTU-1          | 0.38                          | 0.61                  | 0.25             | -0.10            |                               |                  |                                |                  |                  |                       |
| MGII uncultured OTU-2          | -0.37                         | -0.12                 | 0.73             | 0.95             | -0.09                         |                  |                                |                  |                  |                       |
| MGIII uncultured OTU-1         | -0.36                         | -0.13                 | 0.66             | 0.19             | 0.12                          | 0.21             |                                |                  |                  |                       |
| MGIII uncultured OTU-2         | -0.30                         | -0.24                 | 0.49             | 0.16             | -0.07                         | 0.14             | 0.92                           |                  |                  |                       |
| MGIII uncultured OTU-3         | -0.34                         | -0.17                 | 0.63             | 0.20             | 0.08                          | 0.16             | 0.96                           | 0.96             |                  |                       |
| DPANN Woesearchaeota           | -0.29                         | 0.00                  | 0.74             | 0.20             | 0.38                          | 0.19             | 0.89                           | 0.76             | 0.90             |                       |

(b)

|  | Thaumarchaeota Marine Group I |                       |                  |                  | Euryarchaeota Marine Group II |                  |                  | Euryarchaeota Marine Group III |                  |                  | DPANN                 |
|--|-------------------------------|-----------------------|------------------|------------------|-------------------------------|------------------|------------------|--------------------------------|------------------|------------------|-----------------------|
|  | <i>Ca.Nitrosopelagicus</i>    | <i>Nitrosopumilus</i> | uncultured OTU-1 | uncultured OTU-2 | uncultured OTU-1              | uncultured OTU-2 | uncultured OTU-3 | uncultured OTU-1               | uncultured OTU-2 | uncultured OTU-3 | Woesearchaeota DHVE-6 |

|                                |       |       |      |       |       |      |      |      |      |      |  |
|--------------------------------|-------|-------|------|-------|-------|------|------|------|------|------|--|
| MGI <i>Ca.Nitrosopelagicus</i> |       |       |      |       |       |      |      |      |      |      |  |
| MGI <i>Nitrosopumilus</i>      | 0.74  |       |      |       |       |      |      |      |      |      |  |
| MGI uncultured OTU-1           | 0.01  | 0.30  |      |       |       |      |      |      |      |      |  |
| MGI uncultured OTU-2           | 0.14  | -0.02 | 0.75 |       |       |      |      |      |      |      |  |
| MGII uncultured OTU-1          | -0.04 | 0.02  | 0.90 | 0.92  |       |      |      |      |      |      |  |
| MGII uncultured OTU-2          | 0.37  | 0.73  | 0.85 | 0.50  | 0.60  |      |      |      |      |      |  |
| MGII uncultured OTU-3          | 0.82  | 0.91  | 0.47 | 0.31  | 0.32  | 0.77 |      |      |      |      |  |
| MGIII uncultured OTU-1         | -0.21 | 0.29  | 0.33 | -0.16 | -0.05 | 0.47 | 0.02 |      |      |      |  |
| MGIII uncultured OTU-2         | -0.06 | 0.36  | 0.28 | -0.07 | -0.05 | 0.49 | 0.10 | 0.94 |      |      |  |
| MGIII uncultured OTU-3         | -0.16 | 0.35  | 0.40 | -0.06 | 0.02  | 0.57 | 0.09 | 0.98 | 0.95 |      |  |
| DPANN Woesearchaeota           | -0.18 | 0.30  | 0.30 | -0.10 | -0.06 | 0.49 | 0.02 | 0.95 | 0.96 | 0.99 |  |

**Table S7.** Pearson correlation coefficients (r values) obtained from the correlation matrix created using as variables the absolute abundance of the archaeal IPLs (response units per Liter; r.u. L<sup>-1</sup>) detected in the ETSP at the (a) coastal and (b) open ocean stations.

| (a)          |     | GDGT-0 |       |       | GDGT-1 |       |       | GDGT-2 |       |       | GDGT-3 | GDGT-3 | Crenarchaeol |       |       | Archaeol |      |      |    |
|--------------|-----|--------|-------|-------|--------|-------|-------|--------|-------|-------|--------|--------|--------------|-------|-------|----------|------|------|----|
|              |     | MH     | DH    | HPH   | MH     | DH    | HPH   | MH     | DH    | HPH   | DH     | DH     | MH           | DH    | HPH   | MH       | DH   | PG   | PE |
| GDGT-0       | MH  |        |       |       |        |       |       |        |       |       |        |        |              |       |       |          |      |      |    |
|              | DH  | 0.93   |       |       |        |       |       |        |       |       |        |        |              |       |       |          |      |      |    |
|              | HPH | 0.95   | 0.96  |       |        |       |       |        |       |       |        |        |              |       |       |          |      |      |    |
| GDGT-1       | MH  | 0.98   | 0.95  | 0.95  |        |       |       |        |       |       |        |        |              |       |       |          |      |      |    |
|              | DH  | 0.96   | 0.99  | 0.98  | 0.98   |       |       |        |       |       |        |        |              |       |       |          |      |      |    |
|              | HPH | 0.83   | 0.93  | 0.95  | 0.85   | 0.92  |       |        |       |       |        |        |              |       |       |          |      |      |    |
| GDGT-2       | MH  | 0.99   | 0.91  | 0.94  | 0.96   | 0.94  | 0.82  |        |       |       |        |        |              |       |       |          |      |      |    |
|              | DH  | 0.93   | 1.00  | 0.96  | 0.96   | 0.99  | 0.93  | 0.90   |       |       |        |        |              |       |       |          |      |      |    |
|              | HPH | 0.80   | 0.87  | 0.91  | 0.79   | 0.86  | 0.98  | 0.80   | 0.86  |       |        |        |              |       |       |          |      |      |    |
| GDGT-3       | DH  | 0.99   | 0.92  | 0.97  | 0.97   | 0.96  | 0.86  | 0.98   | 0.91  | 0.82  |        |        |              |       |       |          |      |      |    |
| GDGT-4       | DH  | 0.99   | 0.91  | 0.92  | 0.94   | 0.92  | 0.80  | 0.99   | 0.89  | 0.80  | 0.97   |        |              |       |       |          |      |      |    |
| Crenarchaeol | MH  | 0.94   | 0.92  | 0.96  | 0.97   | 0.96  | 0.86  | 0.92   | 0.92  | 0.80  | 0.96   | 0.88   |              |       |       |          |      |      |    |
|              | DH  | 0.60   | 0.81  | 0.74  | 0.66   | 0.76  | 0.88  | 0.57   | 0.83  | 0.84  | 0.59   | 0.57   | 0.62         |       |       |          |      |      |    |
|              | HPH | 0.95   | 0.95  | 1.00  | 0.95   | 0.97  | 0.95  | 0.94   | 0.94  | 0.92  | 0.97   | 0.93   | 0.96         | 0.71  |       |          |      |      |    |
| Archaeol     | MH  | -0.50  | -0.67 | -0.57 | -0.50  | -0.60 | -0.63 | -0.47  | -0.63 | -0.60 | -0.49  | -0.51  | -0.43        | -0.67 | -0.54 |          |      |      |    |
|              | DH  | -0.46  | -0.54 | -0.47 | -0.47  | -0.52 | -0.49 | -0.46  | -0.53 | -0.46 | -0.45  | -0.47  | -0.36        | -0.55 | -0.43 | 0.82     |      |      |    |
|              | PG  | -0.27  | -0.40 | -0.29 | -0.29  | -0.36 | -0.35 | -0.26  | -0.39 | -0.34 | -0.26  | -0.28  | -0.19        | -0.50 | -0.25 | 0.85     | 0.91 |      |    |
|              | PE  | -0.38  | -0.51 | -0.41 | -0.39  | -0.46 | -0.46 | -0.36  | -0.48 | -0.43 | -0.37  | -0.40  | -0.28        | -0.53 | -0.38 | 0.88     | 0.95 | 0.87 |    |

(b)

|              |     | GDGT-0 |       |       | GDGT-1 |       |       | GDGT-2 |       |       | GDGT-3 | GDGT-3 | Crenarchaeol |       |       | Archaeol |      |      |    |
|--------------|-----|--------|-------|-------|--------|-------|-------|--------|-------|-------|--------|--------|--------------|-------|-------|----------|------|------|----|
|              |     | MH     | DH    | HPH   | MH     | DH    | HPH   | MH     | DH    | HPH   | DH     | DH     | MH           | DH    | HPH   | MH       | DH   | PG   | PE |
| GDGT-0       | MH  |        |       |       |        |       |       |        |       |       |        |        |              |       |       |          |      |      |    |
|              | DH  | 0.33   |       |       |        |       |       |        |       |       |        |        |              |       |       |          |      |      |    |
|              | HPH | 0.47   | 0.73  |       |        |       |       |        |       |       |        |        |              |       |       |          |      |      |    |
| GDGT-1       | MH  | 0.93   | 0.52  | 0.53  |        |       |       |        |       |       |        |        |              |       |       |          |      |      |    |
|              | DH  | 0.70   | 0.84  | 0.67  | 0.78   |       |       |        |       |       |        |        |              |       |       |          |      |      |    |
|              | HPH | 0.15   | 0.81  | 0.91  | 0.24   | 0.61  |       |        |       |       |        |        |              |       |       |          |      |      |    |
| GDGT-2       | MH  | 0.88   | 0.40  | 0.39  | 0.97   | 0.66  | 0.08  |        |       |       |        |        |              |       |       |          |      |      |    |
|              | DH  | 0.53   | 0.91  | 0.66  | 0.62   | 0.96  | 0.71  | 0.48   |       |       |        |        |              |       |       |          |      |      |    |
|              | HPH | -0.14  | 0.71  | 0.69  | -0.08  | 0.44  | 0.92  | -0.26  | 0.61  |       |        |        |              |       |       |          |      |      |    |
| GDGT-3       | DH  | 0.93   | 0.34  | 0.67  | 0.84   | 0.69  | 0.36  | 0.77   | 0.54  | 0.05  |        |        |              |       |       |          |      |      |    |
| GDGT-4       | DH  | 0.76   | 0.48  | 0.82  | 0.66   | 0.72  | 0.63  | 0.54   | 0.65  | 0.39  | 0.91   |        |              |       |       |          |      |      |    |
| Crenarchaeol | MH  | 0.94   | 0.10  | 0.29  | 0.80   | 0.56  | -0.01 | 0.77   | 0.40  | -0.26 | 0.89   | 0.72   |              |       |       |          |      |      |    |
|              | DH  | 0.47   | 0.81  | 0.72  | 0.47   | 0.87  | 0.80  | 0.29   | 0.94  | 0.75  | 0.55   | 0.73   | 0.38         |       |       |          |      |      |    |
|              | HPH | 0.46   | 0.61  | 0.98  | 0.51   | 0.56  | 0.85  | 0.40   | 0.54  | 0.60  | 0.68   | 0.81   | 0.31         | 0.61  |       |          |      |      |    |
| Archaeol     | MH  | -0.56  | -0.79 | -0.65 | -0.66  | -0.89 | -0.61 | -0.52  | -0.84 | -0.47 | -0.58  | -0.66  | -0.37        | -0.75 | -0.53 |          |      |      |    |
|              | DH  | -0.50  | -0.71 | -0.62 | -0.58  | -0.83 | -0.58 | -0.46  | -0.78 | -0.44 | -0.56  | -0.66  | -0.33        | -0.69 | -0.52 | 0.97     |      |      |    |
|              | PG  | -0.54  | -0.71 | -0.63 | -0.59  | -0.84 | -0.59 | -0.44  | -0.78 | -0.47 | -0.58  | -0.67  | -0.35        | -0.73 | -0.52 | 0.98     | 0.95 |      |    |
|              | PE  | -0.52  | -0.84 | -0.67 | -0.65  | -0.83 | -0.66 | -0.54  | -0.82 | -0.51 | -0.51  | -0.65  | -0.33        | -0.73 | -0.58 | 0.90     | 0.84 | 0.84 |    |

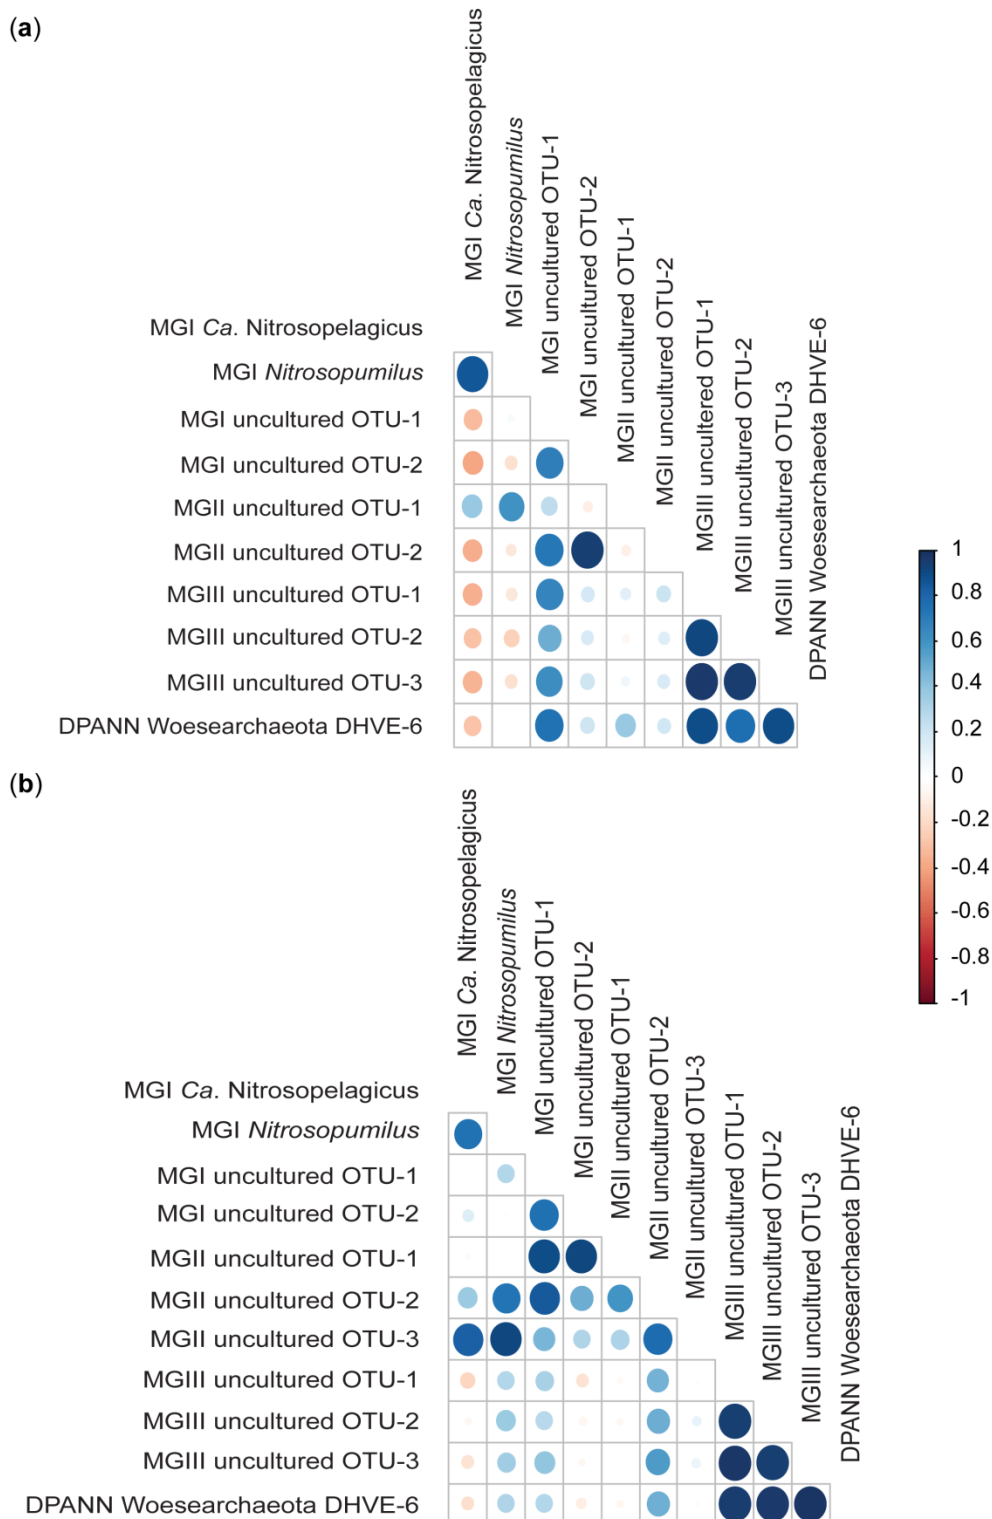

**Figure S1.** Dot plot of the correlation matrix obtained by applying a Pearson analysis to the total archaeal 16S rRNA gene reads (copies L<sup>-1</sup>) of the archaeal groups detected in the ETSP at the **(a)** coastal and **(b)** open ocean stations. Dark blue corresponds to +1 r values, indicating a strong positive linear correlation between archaeal groups; white corresponds to 0 r values, indicating that no correlation exists; dark red corresponds to -1 r values, indicating a strong negative linear correlation.



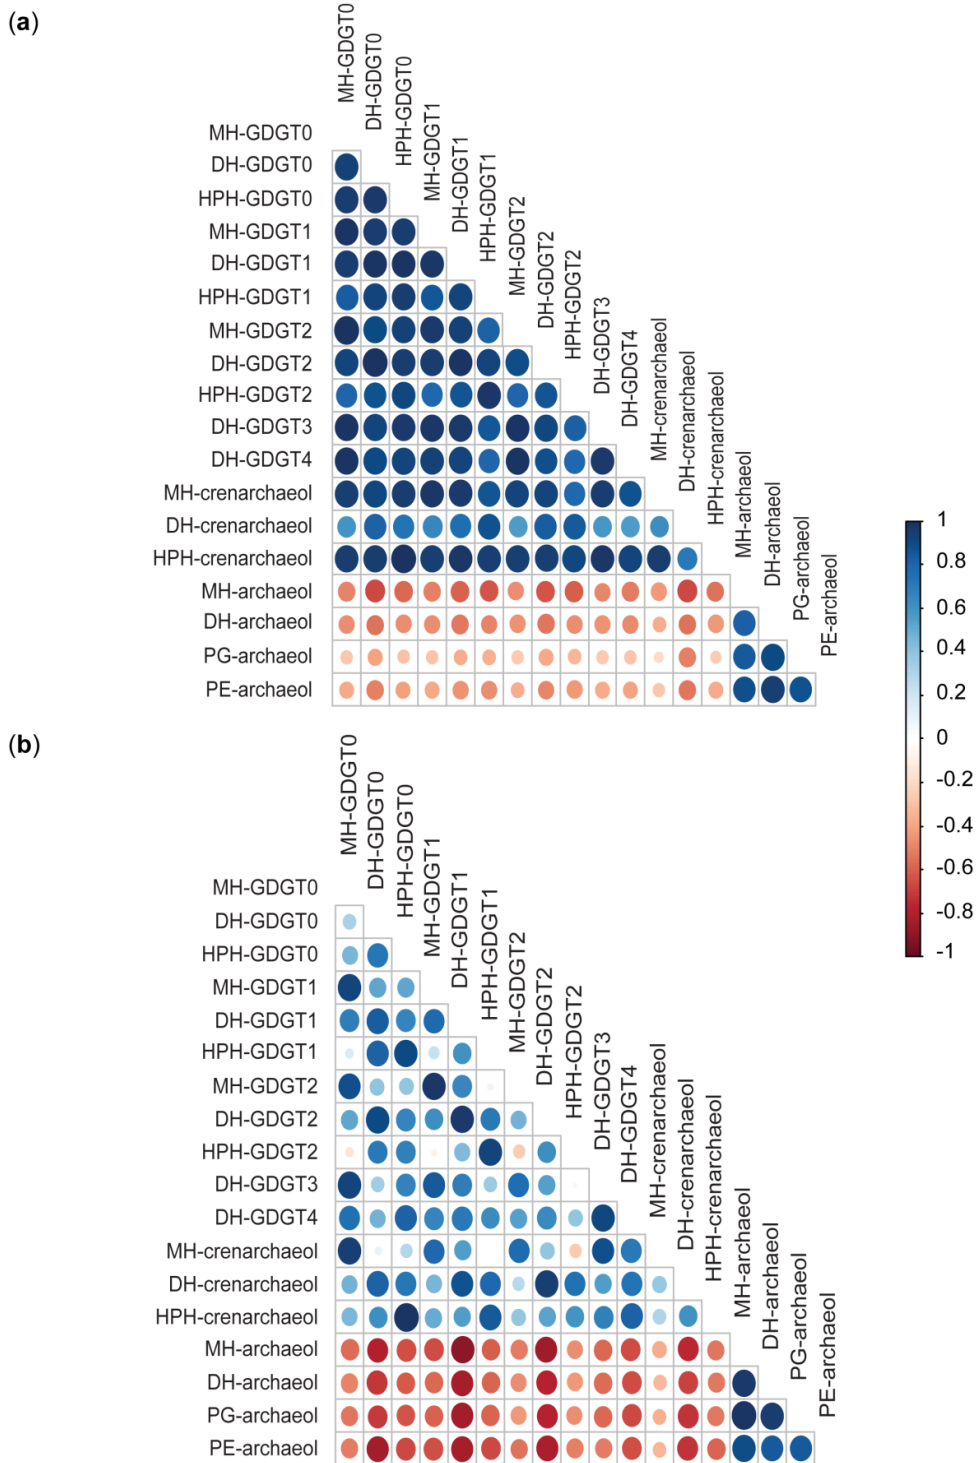

**Figure S2.** Dot plot of the correlation matrix obtained by applying a Pearson analysis to the archaeal IPLs (response units per Liter; r.u. L<sup>-1</sup>) detected in the ETSP, at the (a) coastal and (b) open ocean stations. Dark blue corresponds to +1 r values, indicating a strong positive linear correlation between archaeal groups; white corresponds to 0 r values, indicating that no correlation exists; dark red corresponds to -1 r values, indicating a strong negative linear correlation.
